# Supplementary material for: CNVxplorer: a web tool to assist clinical interpretation of CNVs in rare disease patients
Source: PubMed Central journal article supplement — Nucleic Acids Res. 2021 May 21;49(W1):W93–W103. doi: 10.1093/nar/gkab347 (PMC8262689; doi:10.1093/nar/gkab347), 2021-05-21
Supplement: gkab347_supplemental_file.pdf [file gkab347_supplemental_file.pdf]

## Supplementary Information

\*\*\*\*\*

### CNVxplorer: a web tool to assist clinical interpretation of CNVs in rare disease patients

Francisco Requena<sup>1,2</sup>, Hamza Hadj Abdallah<sup>1,3</sup>, Alejandro García<sup>1,2</sup>, Patrick Nitschké<sup>1,4</sup>, Sergi Romana<sup>1,3</sup>, Valérie Malan<sup>1,3</sup>, Antonio Rausell<sup>1,2,\*</sup>

#### Supplementary Figures and Legends

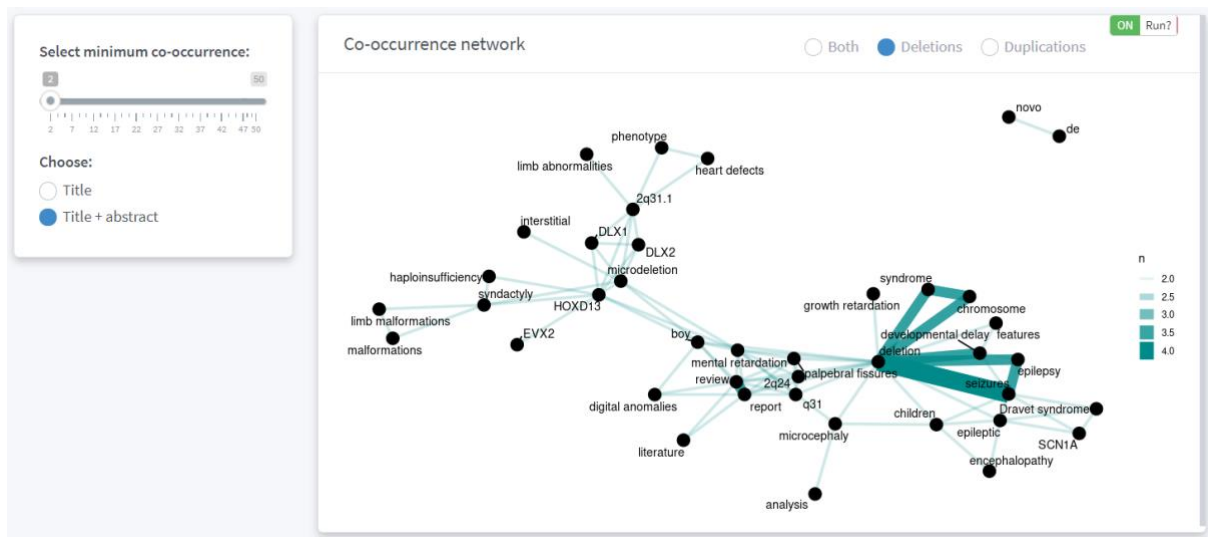

**Supplementary Figure 1.** Entity co-occurrence network automatically extracted by CNVxplorer from Pubmed articles associated to the deletion evaluated in Case study 2 of the main text. The figure represents the view generated in the *Biomedical literature* tab corresponding to the co-occurrence network of words from articles associated to a deletion in chr2(GRCh37):176065894-176504173. Words are represented as nodes, their co-occurrence across articles is represented as links, and the link thickness is proportional to the number of articles where words co-occurred.
